# Supplementary material
Source: Springer Nature journal article supplement (https://www.springermedizin.de/resource/supplementary/13569_2014_65_MOESM3_ESM.pdf/9676750)

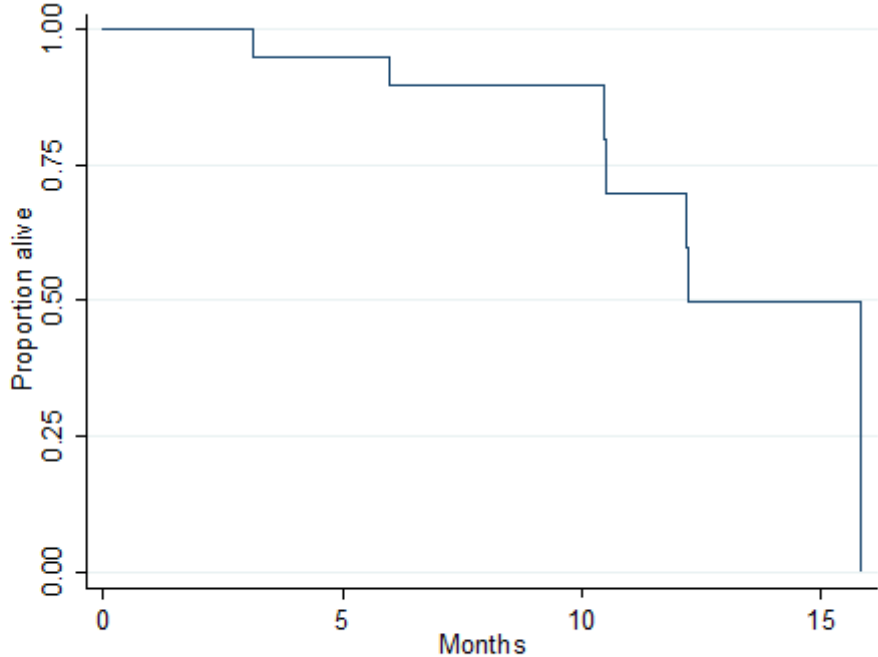

Number at risk

20

18

9

1

Supplement: MOESM3 [file 9676750]
